# Supplementary material
Source: PubMed Central journal article supplement (PMC4863661)
Supplement: mmc1.pdf [file mmc1.pdf]

**The American Journal of Human Genetics, Volume 98**

## **Supplemental Data**

### **Somatic Mutations in *NEK9* Cause Nevus Comedonicus**

**Jonathan L. Levinsohn, Jeffrey L. Sugarman, Yale Center for Mendelian Genomics, Jennifer M. McNiff, Richard J. Antaya, and Keith A. Choate**

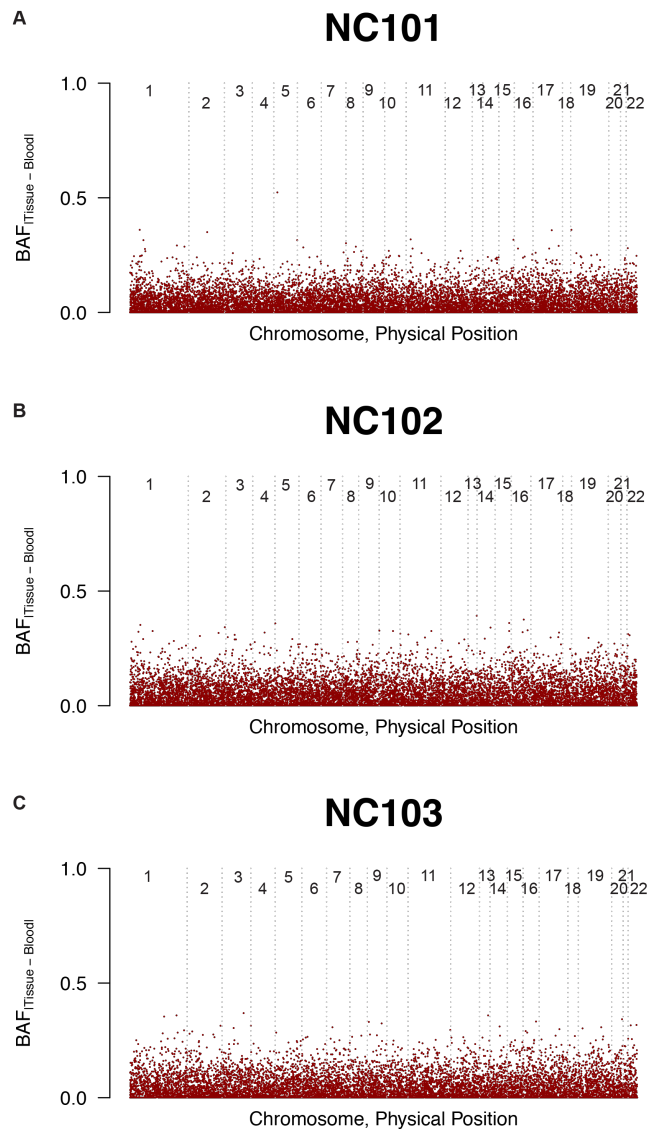

**Supplemental Figure 1. NC lesions demonstrate no regions of loss of heterozygosity.** Difference of B-allele frequency between tissue and blood is plotted against genomic position, demonstrating no regions with altered B-allele frequency. There is no evidence of large segments of loss of heterozygosity in any of the samples.

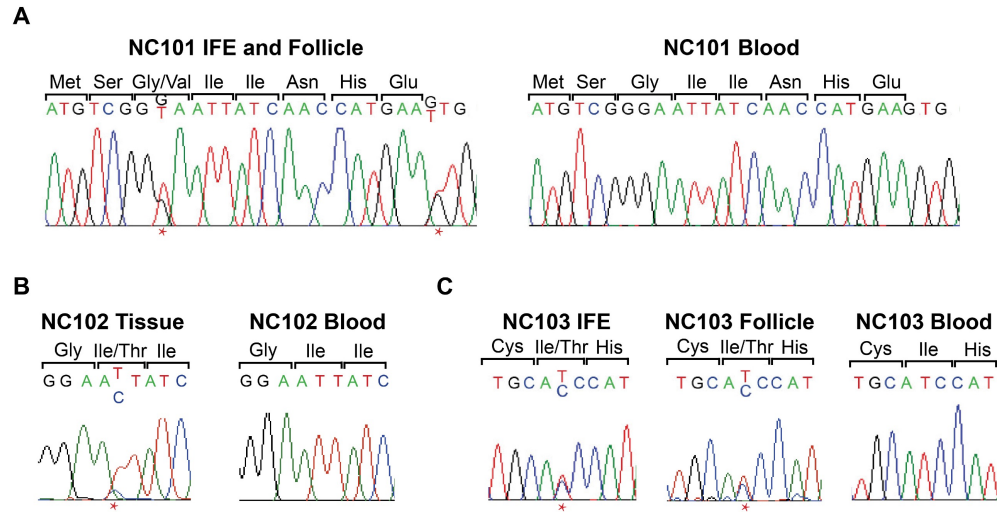

**Supplemental Figure 2. Sanger sequencing confirms somatic mutations identified via whole exome sequencing.** Sanger sequencing of PCR amplified gDNA isolated from laser-captured IFE and follicle tissue for NC101 (A) confirms two mutations. One mutation is at p.Gly572Val, creating a cryptic splice donor site, and the other mutation destroys the normal splice donor site, leading to deletion of Gly572 through Glu577 (Figure S3). These mutations are absent in blood. Sanger sequencing of NC102 gDNA also confirms the p.Ile573Thr mutation is present in DNA isolated from whole affected tissue (B), but is absent in blood. Sanger sequence of laser-captured IFE and follicle tissue NC103 (C) confirms a somatic p.Ile167Thr mutation in IFE and in follicle.

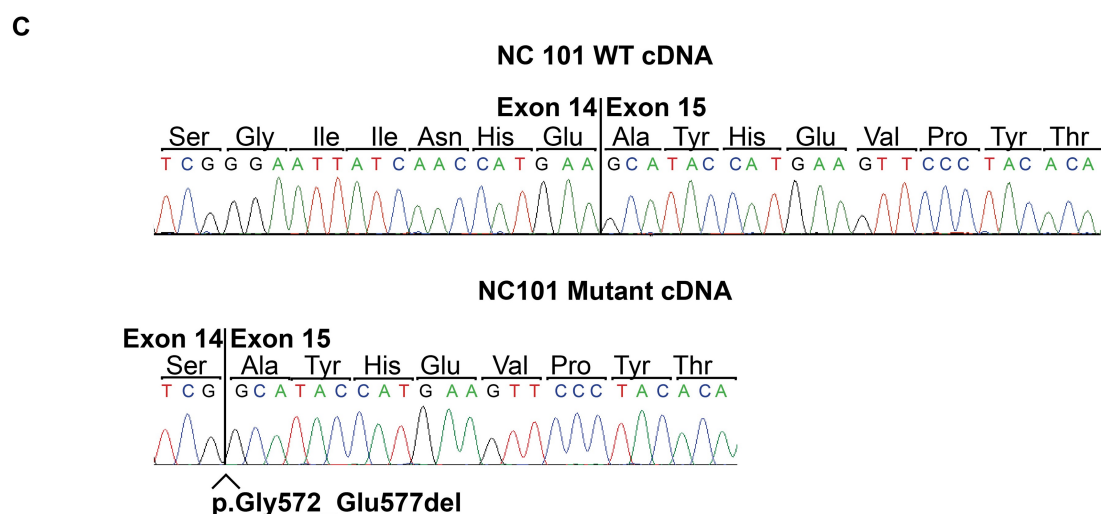

**Supplemental Figure 3. Analysis of *NEK9* splicing mutation in NC101 tissue reveals a 6 amino acid deletion.** Two mutations are present in NC101 tissue in *cis*. The first mutation appears to abolish a splice donor, and the second mutation creates a potential novel upstream splice donor (A). To experimentally assess the consequence of this mutant allele upon encoded RNA, high-fidelity Advantage II long range PCR (Clontech) of genomic DNA from NC101 was used to create amplicons consisting of exons 13-15 including flanking intronic regions. This amplicon was TA-cloned (Invitrogen). Clones were sequenced to confirm that they contained the mutant allele without additional mutations introduced by PCR, and were then cloned into pCDNA 3.1 using Kpn1 and Not1. WT and mutant plasmids were transfected into PLC cells. 48 hours after transfection, RNA was

isolated using the RNEasy kit (QIAGEN). cDNA was generated using the iScript kit (BD Biosciences). PCR was then performed and products were run on a 1% agarose gel (B) demonstrating that NC101 mutant allele cDNA was shorter than the WT allele. Sanger sequencing of these products revealed that the NC101 mutant lacked 18 nucleotides encoding amino acids 'Gly,Ile,Ile,Asn,His,Glu' which fall within the RCC1 domain (C).

|              |                                                     |                         |           |    |
|--------------|-----------------------------------------------------|-------------------------|-----------|----|
| HUMAN_NEK9   | MSVLGEYERHCDSINSDFGSESGGCGDSSPGPSASQGPRAGGGAAEQEELH | YIPIRVLGR               | 60        |    |
| RHESUS_NEK9  | MSVLGEYERHCDSINSDFGSESGGCGDSSPGPSASQGPRAGGGAAEQEELH | YIPIRVLGR               | 60        |    |
| MOUSE_NEK9   | MSVLGEYERHCDSINSDFGSESGGGGDS                        | GPGPSAVPGPRAGGGAAEQEELH | YIPIRVLGR | 60 |
| RAT_NEK9     | MSVLGEYERHCDSINSDFGSESGGGGDS                        | SGPSASPGPRAGG-AAEQEELH  | YIPIRVLGR | 59 |
| COW_NEK9     | MSVLGEYERHCDSLNSDFGSESGGGGDS                        | GPGPSAGPVPRASGGAAEQEELH | YIPIRVLGR | 60 |
| XENOPUS_NEK9 | MSALGRYDRHCDSINSDFGDSVRS                            | CG-----PEQEELH          | YIPIRVLGH | 42 |

|              |                   |                                             |                 |     |
|--------------|-------------------|---------------------------------------------|-----------------|-----|
| HUMAN_NEK9   | GAFGEATLYRRTEDDSL | VVWKEVDLTRLSEKERRDALNEIVILALLQHDNIIAYYNHFMD | 120             |     |
| RHESUS_NEK9  | GAFGEATLYRRTEDDSL | VVWKEVDLTRLSEKERRDALNEIVILALLQHDNIIAYYNHFMD | 120             |     |
| MOUSE_NEK9   | GAFGEATLYRRTEDDSL | VVWKEVDLTRLSEKERRDALNEIVILALLQHDNIIAYYNHFMD | 120             |     |
| RAT_NEK9     | GAFGEATLYRRTEDDSL | VVWKEVDLTRLSEKERRDALNEIVILALLQHDNIIAYYNHFMD | 119             |     |
| COW_NEK9     | GAFGEATLYRRTEDDSL | VVWKEVDLTRLSEKERRDALNEIVILALLQHDNIIAYYNHFMD | 120             |     |
| XENOPUS_NEK9 | GAYGEATLYRRTEDDSL | VVWKEVGLARLSEKERRDALNEIVILSL                | LQHDNIIAYYNHFLD | 102 |

**\*NC103**

|              |                                                              |                                              |     |
|--------------|--------------------------------------------------------------|----------------------------------------------|-----|
| HUMAN_NEK9   | NTTLLIELEYCNGGNLYDKILRQKDKLFEEEMVVWYLFQIVSAVSCIHKAGILHRDIKTL | 180                                          |     |
| RHESUS_NEK9  | NTTLLIELEYCNGGNLYDKILRQKDKLFEEEMVVWYLFQIVSAVSCIHKAGILHRDIKTL | 180                                          |     |
| MOUSE_NEK9   | NTTLLIELEYCNGGNLYDKILRQKDKLFEEEMVVWYLFQIVSAVSCIHKAGILHRDIKTL | 180                                          |     |
| RAT_NEK9     | NTTLLIELEYCNGGNLYDKILRQKDKLFEEEMVVWYLFQIVSAVSCIHKAGILHRDIKTL | 179                                          |     |
| COW_NEK9     | NTTLLIELEYCNGGNLYDKILRQKDKLFEEEMVVWYLFQIVSAVSCIHKAGILHRDIKTL | 180                                          |     |
| XENOPUS_NEK9 | SNTLLIELEYCNGGNL                                             | FDKIVRQKAQLFQEEMVLWYLFQIVSAVSCIHRAGILHRDIKTL | 162 |

|              |                                           |                      |                      |     |
|--------------|-------------------------------------------|----------------------|----------------------|-----|
| HUMAN_NEK9   | NIFLTKANLIKLG DYGLAKKLNSEYSMAETLVGTPYYMSP | ELCQGVKYNFKSDIWAVGCV | 240                  |     |
| RHESUS_NEK9  | NIFLTKANLIKLG DYGLAKKLNSEYSMAETLVGTPYYMSP | ELCQGVKYNFKSDIWAVGCV | 240                  |     |
| MOUSE_NEK9   | NIFLTKANLIKLG DYGLAKKLNSEYSMAETLVGTPYYMSP | ELCQGVKYNFKSDIWAVGCV | 240                  |     |
| RAT_NEK9     | NIFLTKANLIKLG DYGLAKKLNSEYSMAETLVGTPYYMSP | ELCQGVKYNFKSDIWAVGCV | 239                  |     |
| COW_NEK9     | NIFLTKANLIKLG DYGLAKKLNSEYSMAETLVGTPYYMSP | ELCQGVKYNFKSDIWAVGCV | 240                  |     |
| XENOPUS_NEK9 | NIFLTKANLIKLG DYGLAKQLSSEYSMAET           | CVGTLYYMSP           | ELCQGVKYSFKSDIWAVGCV | 222 |

|              |                                                              |       |     |
|--------------|--------------------------------------------------------------|-------|-----|
| HUMAN_NEK9   | IFELLTLKRTFDATNPLNLCVKIVQGIRAMEVDSSQYSLELIQMVHSCLDQDPEQRPTAD | 300   |     |
| RHESUS_NEK9  | IFELLTLKRTFDATNPLNLCVKIVQGIRAMEVDSSQYSLELIQMVHSCLDQDPEQRPTAD | 300   |     |
| MOUSE_NEK9   | IFELLTLKRTFDATNPLNLCVKIVQGIRAMEVDSSQYSLELIQLVHACLDQDPEQRP    | AAD   | 300 |
| RAT_NEK9     | IFELLTLKRTFDATNPLNLCVKIVQGIRAMEVDSSQYSLGLIQLVHACLDQDPER      | RPTAD | 299 |
| COW_NEK9     | IFELLTLKRTFDATNPLNLCVKIVQGIRAMEVDSSQYSLELIQMVHACLDQDPEQRPTAD | 300   |     |
| XENOPUS_NEK9 | LYELLTLTRTFDATNPLNLCVKIVQGNWAMGLDNSVYSQDLIEVVHACLEQDPEKRPTAD | 282   |     |

|              |        |                       |                                    |                              |     |
|--------------|--------|-----------------------|------------------------------------|------------------------------|-----|
| HUMAN_NEK9   | ELLDRP | LLRKRRREMEEKVTLLNAPT  | KRPRSSTVTEAPIAVVTSRTSEVYVWGGGKSTPQ | 360                          |     |
| RHESUS_NEK9  | ELLDRP | LLRKRRREMEEKVTLLNAPT  | KRPRSSTVTEAPIAVVTSRTSEVYVWGGGKSTPQ | 360                          |     |
| MOUSE_NEK9   | ALLDL  | PLLRTRRREMEEKVTLLNAPT | KRPRSSTVTEAPIAVVTSRTSEVYVWGGGKSTPQ | 360                          |     |
| RAT_NEK9     | ALLDL  | PLLRKRRREMEEKVTLLNAPT | KRPRSSTVTEAPIAVVTSRTSEVYVWGGGKSTPQ | 359                          |     |
| COW_NEK9     | ELLDRP | LLRKRRREMEEKVTLLNAPT  | KRPRSSTVTEAPIAVVTSRTSEVYVWGGGKSTPQ | 360                          |     |
| XENOPUS_NEK9 | EILKMP | ILSWRRRDMEEKVSM       | LNRSNKKKPRGT                       | VTVEAPIAVVTSRSSEVYVWGGGKTTPQ | 342 |

|              |                                                         |                                                                 |     |
|--------------|---------------------------------------------------------|-----------------------------------------------------------------|-----|
| HUMAN_NEK9   | K L D V I K S G C S A R Q V C A G N T H F A V V T V E K | E L Y T W V N M Q G G T K L H G Q L G H G D K A S Y R Q P K H V | 420 |
| RHESUS_NEK9  | K L D V I K S G C S A R Q V C A G N T H F A V V T V E K | E L Y T W V N M Q G G T K L H G Q L G H G D K A S Y R Q P K H V | 420 |
| MOUSE_NEK9   | K L D V I K S G C S A R Q V C A G N T H F A V V T V E K | E L Y T W V N M Q G G T K L H G Q L G H G D K A S Y R Q P K H V | 420 |
| RAT_NEK9     | K L D V I K S G C S A R Q V C A G N T H F A V V T V E K | E L Y T W V N M Q G G T K L H G Q L G H G D K A S Y R Q P K H V | 419 |
| COW_NEK9     | K L D V I K S G C S A R Q V C A G N T H F A V V T V E K | E L Y T W V N M Q G G T K L H G Q L G H G D K A S Y R Q P K H V | 420 |
| XENOPUS_NEK9 | K L D V F K G G C R A R Q V C A G D A H F A V V T V E K | E L Y T W V N M Q G G S K L H G Q L G H G D R A S Y R Q P K H V | 402 |

|              |                                                                                                                         |     |
|--------------|-------------------------------------------------------------------------------------------------------------------------|-----|
| HUMAN_NEK9   | E K L Q G K A I R Q V S C G D D F T V C V T D E G Q L Y A F G S D Y Y G C M G V D K V A G P E V L E P M Q L N F F L S N | 480 |
| RHESUS_NEK9  | E K L Q G K A I H Q V S C G D D F T V C V T D E G Q L Y A F G S D Y Y G C M G V D K V A G P E V L E P M Q L N F F L S N | 480 |
| MOUSE_NEK9   | E K L Q G K A I H Q V S C G D D F T V C V T D E G Q L Y A F G S D Y Y G C M G V D K V S G P E V L E P M Q L N F F L S N | 480 |
| RAT_NEK9     | E K L Q G K A I H Q V S C G D D F T V C V T D E G Q L Y A F G S D Y Y G C M G V D K V S G P E V L E P M Q L N F F L S N | 479 |
| COW_NEK9     | E K L Q G K A I R Q V S C G D D F T V C V T D E G Q L Y A F G S D Y Y G C M G V D K V A G A E V L E P M Q L D F F L S N | 480 |
| XENOPUS_NEK9 | E K L Q G K S V Q Q V S C G S D F T V C I S D E G Q L Y S F G S D Y Y G C L G V N Q S A G A E V L E P L L V D F F L N E | 462 |

|              |                                                                                                                         |     |
|--------------|-------------------------------------------------------------------------------------------------------------------------|-----|
| HUMAN_NEK9   | P V E Q V S C G D N H V V V L T R N K E V Y S W G C G E Y G R L G L D S E E D Y Y T P Q K V D V P K A L I I V A V Q C G | 540 |
| RHESUS_NEK9  | P V E Q V S C G D N H V V V L T R N K E V Y S W G C G E Y G R L G L D S E E D Y Y T P Q K V D V P K A L I I V A V Q C G | 540 |
| MOUSE_NEK9   | P V E Q V S C G D N H V V V L T R N K E V Y S W G C G E Y G R L G L D S E E D Y Y T P Q R V D V P K A L I I V A V Q C G | 540 |
| RAT_NEK9     | P V E Q V S C G D N H V V V L T R N K E V Y S W G C G E Y G R L G L D S E E D Y Y T P Q R V D V P K A L I I V A V Q C G | 539 |
| COW_NEK9     | P V E Q V S C G D N H V V V L T R N K E V Y S W G C G E Y G R L G L D S E E D Y Y T P Q K V D V P K A L I I V A V Q C G | 540 |
| XENOPUS_NEK9 | P V E Q V S C G D S H I I A L T R S K C V Y S W G C G E Y G R L G L D S E D D V Y S P Q K V E V Q R D L C I V N V C C G | 522 |

\* NC102  
\*\*\*\*\* NC101

|              |                                                                                                                         |     |
|--------------|-------------------------------------------------------------------------------------------------------------------------|-----|
| HUMAN_NEK9   | C D G T F L L T Q S G K V L A C G L N E F N K L G L N Q C M S G I I N H E A Y H E V P Y T T S F T L A K Q L S F Y K I R | 600 |
| RHESUS_NEK9  | C D G T F L L T Q S G K V L A C G L N E F N K L G L N Q C M S G I I N H E A Y H E V P Y T T S F T L A K Q L S F Y K I R | 600 |
| MOUSE_NEK9   | C D G T F L L T Q S G K V L A C G L N E F N K L G L N Q C M S G I I N H E A Y H E V P Y T T S F T L A K Q L S F Y K I R | 600 |
| RAT_NEK9     | C D G T F L L T Q S G K V L A C G L N E F N K L G L N Q C M S G I I N H E A Y H E V P Y T T S F T L A K Q L S F Y K I R | 599 |
| COW_NEK9     | C D G T F L L T Q S G K V L A C G L N E F N K L G L N Q C M S G I I N H E A Y H E V P Y T T S F T L A K Q L S F Y K I R | 600 |
| XENOPUS_NEK9 | S D G S F L L T L T G K V L A C G L N E H N K L G L N Q Y T A G I I N H E A F Q E V P Y T T S L T L A K Q L S F Y K I R | 582 |

|              |                                                                                                                         |     |
|--------------|-------------------------------------------------------------------------------------------------------------------------|-----|
| HUMAN_NEK9   | T I A P G K T H T A A I D E R G R L L T F G C N K C G Q L G V G N Y K K R L G I N L L G G P L G G K Q V I R V S C G D E | 660 |
| RHESUS_NEK9  | T I A P G K T H T A A I D E R G R L L T F G C N K C G Q L G V G N Y K K R L G I N L L G G P L G G K Q V I R V S C G D E | 660 |
| MOUSE_NEK9   | T I A P G K T H T A A I D E R G R L L T F G C N K C G Q L G V G N Y K K R L G I N L L G G P L G G K Q V I R V S C G D E | 660 |
| RAT_NEK9     | T I A P G K T H T A A I D E R G R L L T F G C N K C G Q L G V G N Y K K R L G I N L L G G P L G G K Q V I R V S C G D E | 659 |
| COW_NEK9     | T I A P G K T H T A A L D E R G R L L T F G C N K C G Q L G V G N Y K K R L G I N L L G G P L G G K Q V I R V S C G D E | 660 |
| XENOPUS_NEK9 | S I S P G R T H T A A I D E R G R L L T F G S N K C G Q L G V G D Y R K H L G I N L L G G P L G G K Q V I R V S C G D E | 642 |

|              |                                                                                                                         |     |
|--------------|-------------------------------------------------------------------------------------------------------------------------|-----|
| HUMAN_NEK9   | F T I A A T D D N H I F A W G N G G N G R L A M T P T E R P H G S D I C T S W P R P I F G S L H H V P D L S C R G W H T | 720 |
| RHESUS_NEK9  | F T I A A T D D N H I F A W G N G G N G R L A M T P T E R P H G S D I C T S W P R P I F G S L H H V P D L S C R G W H T | 720 |
| MOUSE_NEK9   | F T I A A T D D N H I F A W G N G G N G R L A M T P T E R P H G S D I C T S W P R P I F G S L H H V P D L S C R G W H T | 720 |
| RAT_NEK9     | F T I A A T D D N H I F A W G N G G N G R L A M T P T E R P H G S D I C T S W P R P I F G S L H H V P D L S C R G W H T | 719 |
| COW_NEK9     | F T I A A T D D N H I F A W G N G G N G R L A M T P T E R P H G S D I C T S W P R P I F G S L H H V P D L S C R G W N T | 720 |
| XENOPUS_NEK9 | F T I A A T A D N H I F A W G N G G N G R L A M T P N E R P Q G S D I C T S W P R P I F G S L H H V T D L S C R G W H T | 702 |

|              |                                                                                                                         |     |
|--------------|-------------------------------------------------------------------------------------------------------------------------|-----|
| HUMAN_NEK9   | I L I V E K V L N S K T I R S N S S G L S I G T V F Q S S S P G G G G G G G G G - - - - - E E E D S Q Q E S E T P D     | 773 |
| RHESUS_NEK9  | I L I V E K V L N S K T I R S N S S G L S I G T V F Q S S S P G G G G G G G G G - - - - - E E E D S Q Q E S E T L D     | 773 |
| MOUSE_NEK9   | I L I V E K V L N S K T I R S N S S G L S I G T V F Q S S S P G G G I G G G G G G G G G G G G E E E D S Q Q E S E T P D | 780 |
| RAT_NEK9     | I L I V E K V L N S K T I R S N S S G L S I G T V F Q S S S P G G R I G G G G G - - - - - E E E D S Q Q E S E T P D     | 772 |
| COW_NEK9     | I L I V E K V L N S K T I R S N S S G L S I G T V F Q S S S P G G G S G G G R E - - - - - D D S Q Q E S E T P D         | 772 |
| XENOPUS_NEK9 | I L I V E K V L N S K T I R S N S S G L S I G T L A Q S C S S G S G S - - - - - R E E D S E R E S L T S D               | 750 |

  

|              |                                                                                                                         |     |
|--------------|-------------------------------------------------------------------------------------------------------------------------|-----|
| HUMAN_NEK9   | P S G G F R G T M E A D R G M E G L I S P T E A M G N S N G A S S S C P G W L R K E L E N A E F I P M P D S P S P L S A | 833 |
| RHESUS_NEK9  | P S G G F R G T M E A D R G M E G L I S P T E A M G N S N G A S S S C P G W L R K E L E N A E F I P M P D S P S P L S A | 833 |
| MOUSE_NEK9   | P S G G F R G T M E A D R G M E G L I S P T E A V G N S C G A S S S C P G W L R K E L E N A E F I P M P D S P A P L S A | 840 |
| RAT_NEK9     | P S G G F R G T M E A D R G M E G L I S P T E A V G N S C G A S S S C P G W L R K E L E N A E F I P M P D S P T P L S A | 832 |
| COW_NEK9     | P S G G F R G T M E A D R G M E G L V S P T E A M R I S S G A S S S C P G W L R K E L E N A E F I P M P D S P S P L S A | 832 |
| XENOPUS_NEK9 | P S R G F R G T I E A E P - E T G P F N T T E N M E - - - - S S S C P S W L R Q E L E E A E F I P M P D T P N - - F V   | 802 |

  

|              |                                                                                                                         |     |
|--------------|-------------------------------------------------------------------------------------------------------------------------|-----|
| HUMAN_NEK9   | A F S E S E K D T L P Y E E L Q G L K V A S E A P L E H K P Q V E A S S P R L N P A V T C A G K G T P L T P P A C A C S | 893 |
| RHESUS_NEK9  | A F S E S E K D T L P Y E E L Q G L K V A S E A P L E H K P Q V G A W S P R L N P A V T C A G K G T P L T P P A C A C S | 893 |
| MOUSE_NEK9   | A F S Q S E K D T L P Y E E L Q G L K V A S E V P P E P Q R A A G A W P P R L D P A V P C V G K - - A L T S A A C A C S | 898 |
| RAT_NEK9     | A F S Q S E K D T L P Y E E L Q G L K V A S E V P P E H Q P A V G A W P P R L N P A V P C V G K - - A L T S P A C A C S | 890 |
| COW_NEK9     | A F S E S E K D T L P Y D E L Q G L K M A S E A P L E H K P P A G A W P P R L N P A G T C A G K G - T P L A P T C A C S | 891 |
| XENOPUS_NEK9 | S M E S S Q N G T T S L Q D V K E T P N A L E K P - - - - - S F Q A C T C S                                             | 835 |

  

|              |                                                                                                                         |     |
|--------------|-------------------------------------------------------------------------------------------------------------------------|-----|
| HUMAN_NEK9   | S L Q V E V E R L Q G L V L K C L A E Q Q K L Q Q E N L Q I F T Q L Q K L N K K L E G G Q Q V G M H S K G T Q T A K E E | 953 |
| RHESUS_NEK9  | S L Q V E V E R L Q G L V L K C L A E Q Q K L Q Q E N L Q I F T Q L Q K L N K K L E G G Q Q V G M H S K G T Q T A K E E | 953 |
| MOUSE_NEK9   | A L Q V E V D R L Q A L V L K C L E E Q Q K L Q Q E N L Q M F T Q L Q K L N K K L E G G Q Q V G M H S R G T Q T A K E E | 958 |
| RAT_NEK9     | A L Q V E V E R L Q G L V L K C L D E Q Q K L Q Q E N L Q I V T Q L Q K L N K R L E G G Q Q V G M H S R G T Q T A K E D | 950 |
| COW_NEK9     | S L Q V E V E R L Q G L V L K C L A E Q Q K L Q Q E N L Q I F T Q L Q K L N K K L E G G Q Q V G M H S K G T Q T A K D E | 951 |
| XENOPUS_NEK9 | T L Q E E V R K L Q D V V S T Y R S E Q E L L C R E N S R L A L E V Q E L N A K L Q S A M Q L A L Y W K S S P P S A G N | 895 |

  

|              |                                                             |  |
|--------------|-------------------------------------------------------------|--|
| HUMAN_NEK9   | M E M D P K P D L D S D S W C L L G T D S C R P S L - - - - |  |
| RHESUS_NEK9  | M E M D P K P D L D S D S W C L L G T D S C R P S L - - - - |  |
| MOUSE_NEK9   | M E M D P K P D L D S E S W C L L G T D S C R P S L - - - - |  |
| RAT_NEK9     | R K W I Q S L T - - - - -                                   |  |
| COW_NEK9     | T E T D P R P D L D S D S W C L L G T D S C R P S L - - - - |  |
| XENOPUS_NEK9 | A E T S - R E D S D A E S W C F L G T E A C R S S S G T P M |  |

**Supplemental Figure 4. NC101, NC102 and NC103 mutations are at conserved residues.** Human, rhesus, mouse, rat, cow and *Xenopus* NEK9 orthologs were aligned using CLUSTAL-omega. The amino acids affected by NC101, NC102 and NC103 mutations are indicated by a red asterisk above the amino acid(s) involved. All mutations affect amino acids that are highly conserved across vertebrate species. The kinase domain (residues 52-308) and RCC1 domain (residues 388-726) are outlined in black.

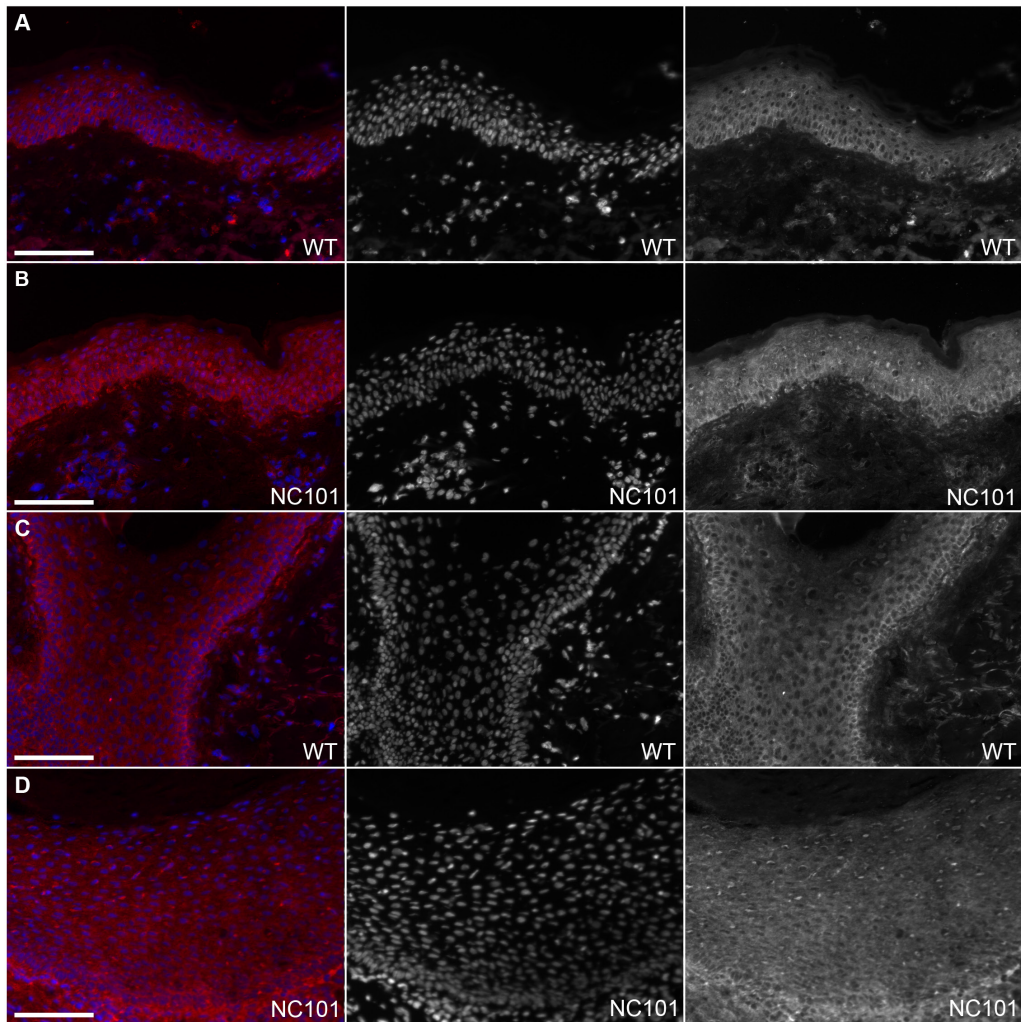

**Supplemental Figure 5. NEK9 shows cytoplasmic localization in wild-type and NC epidermis.** Frozen lesional NC tissue and wild-type (WT) tissue from margins of surgical excisions were fixed with 1:1 methanol:acetone at -20 C. Rabbit Anti-NEK9 antibody (Abcam; ab138488) was used at 1:250 dilution. Immunolocalization studies show that NEK9 localizes to the cytoplasm in IFE (A) and hair follicles (C) in wild-type tissue, and shows cytoplasmic localization in NC101 IFE (B) and cysts (D). Scale = 100  $\mu$ m.

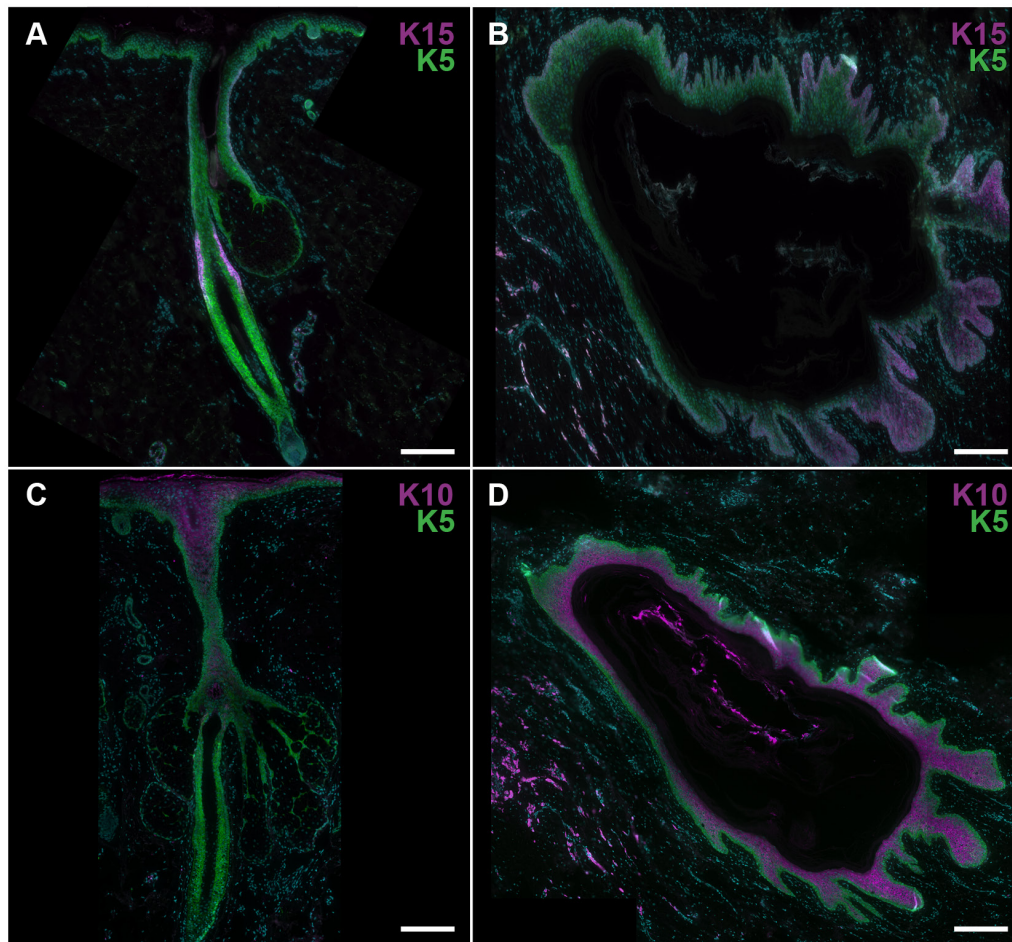

**Supplemental Figure 6. Expansion of K15 localization and ectopic K10 immunolocalization in NC comedones and cysts.** Stitched images of normal and NC tissue further illustrate the defect in differentiation found in NC. In normal hair follicles, K15 is found localized within the bulge region (A). However in NC, we see ectopic K15 staining of deep dermal cysts, (B). K10 is restricted to the IFE and superficial regions of the wild-type hair follicles (C), however we see suprabasal localization of K10 in NC follicles and deep dermal cysts (D). Scale = 200  $\mu$ m.

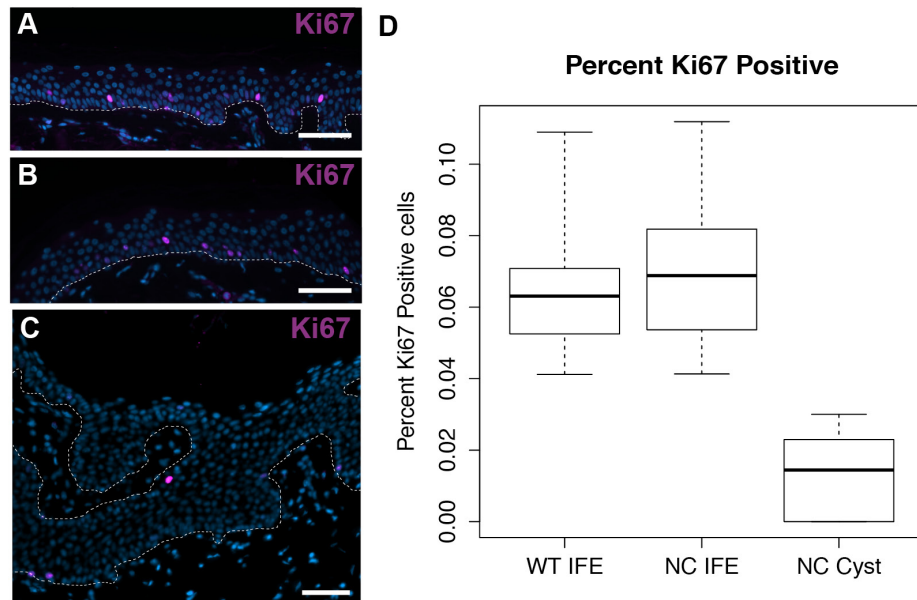

**Supplemental Figure 7. Ki67 immunolocalization reveals no evidence of hyperproliferation in NC tissue.** To assess proliferation within NC lesions, Ki67 (Abcam; 15580, 1:300 dilution), positive cells were counted in twenty 20x fields of view and normalized to total number of basal keratinocytes. T-tests were performed to compare the NC IFE, WT IFE, and NC cyst tissue. T-test of Ki67 staining revealed similar number of positive cells in WT IFE (A) and NC IFE (B) tissue, p-value = 0.459 (D). Cystic regions of NC tissue demonstrated fewer Ki67 positive cells than either WT or NC IFE (C,D), p-values <  $10^{-8}$ , T-test. Scale = 50  $\mu$ m.

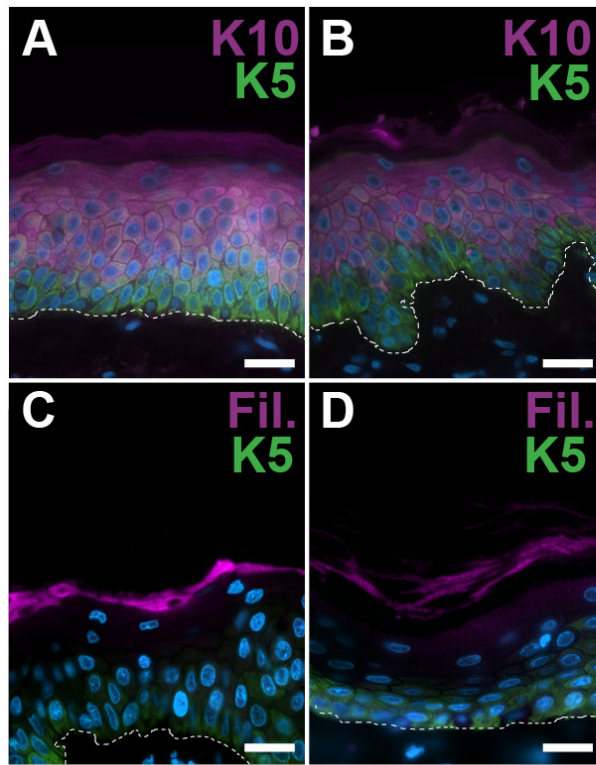

**Supplemental Figure 8. NC IFE shows features of normal differentiation.** Keratin 10 localizes to supra basal layers of wild-type tissue (A) (Santa Cruz; sc-53252, 1:200 dilution) (A) and is also suprabasal in NC103 IFE (B). Similar localization of filaggrin (Abcam; ab17808, 1:400 dilution) is seen in wild-type (C) and NC103 IFE (D). Keratin 5 staining marks the basal layer of the IFE. Dermal-epidermal junction is marked by dashed white line. Scale bar = 20 μm.

| Sample       | Mean Coverage | Bases Covered >8x | Bases Covered >20x | Mean Read Length |
|--------------|---------------|-------------------|--------------------|------------------|
| NC101 Tissue | 189.9x        | 98%               | 97%                | 74 bases         |
| NC101 Blood  | 107.9x        | 97%               | 93%                | 74 bases         |
| NC102 Tissue | 93.4x         | 98%               | 94%                | 74 bases         |
| NC102 Blood  | 86.9x         | 97%               | 88%                | 74 bases         |
| NC103 Tissue | 119.5x        | 97%               | 94%                | 74 bases         |
| NC103 Blood  | 86.6x         | 97%               | 93%                | 74 bases         |

**Supplemental Table 1. Whole exome sequencing coverage.** Whole exome paired-end 74bp sequencing of tissue and blood was performed for three samples. DNA was sheared and barcoded, followed by capture with Roche EZ exome V3 capture probes. Sequencing was performed using the Illumina HiSeq 2500. Blood samples were run at 6 samples per lane, while tissue samples were run at 4 samples per lane. Sequence was aligned to hg19 using BWA-MEM. Reads were then trimmed. PCR duplicates removed using Picard and BAM files were calibrated with GATK. In all samples, >97% of coding region bases are covered >8x yielding sufficient coverage for analysis.

| SSNVs Called<br>with Filter   | NC101 | NC102 | NC103 |
|-------------------------------|-------|-------|-------|
| All Called                    | 16    | 50    | 22    |
| Within Exons/<br>Splice Sites | 9     | 21    | 22    |
| Nonsynonymous                 | 7     | 13    | 15    |
| > 0.1% Prevalance<br>in ExAC  | 3     | 6     | 13    |
| Fisher Test<br>p-value > 0.1% | 2*    | 1*    | 1*    |

**Supplemental Table 2. SSNV filtering results.** To identify tissue-specific mutations, a Perl script was used in tandem with MuTect. A Fisher Exact test was performed to determine non-reference read enrichment in tissue, and SSNVs with p-value greater than  $1 \times 10^{-3}$  were excluded; genome wide significance is  $1.7 \times 10^{-6}$  after Bonferroni correction. The smallest p-values of the Fisher test for damaging SSNVs not within *Nek9* were 0.25, 0.02 and 0.12 in NC101, NC102 and NC103, respectively. To remove non-damaging SSNVs, we filtered to exclude synonymous mutations and intronic variants. SSNVs reported at greater than 1% of the population in the ExAC control database were filtered. SSNVs were then inspected on Integrative Genome Viewer (IGV) to ensure correct mapping. The remaining 4 *NEK9* mutations were not found within ExAC, 1000 Genomes and NHLBI Exome Variant Server, and dbSNP control data sets. Mutations found via WES were validated with Sanger sequencing, and confirmed via laser capture microscopy in NC101 and NC103, for which tissue was available (Figure S2). Asterisk indicates that all of these mutations were within *NEK9*.
